# Supplementary material
Source: ML conference proceedings conference paper supplement (https://proceedings.neurips.cc/paper_files/paper/2022/hash/7b2e844c52349134268e819a9b56b9e8-Abstract.html)
Supplement: Supplementary file 1 [file 7b2e844c52349134268e819a9b56b9e8-Supplemental-Conference.zip]

Archive with 3 entries (2 files):
- nips2022_supplementary/
- nips2022_supplementary/DG-VAE.zip
- nips2022_supplementary/NeurIPS_2022_Appendix_Rebuttal_Revision.0808.pdf
